# Supplementary material for: Targeted theranostic liposomes: rifampicin and ofloxacin loaded pegylated liposomes for theranostic application in mycobacterial infections
Source: Royal Society of Chemistry journal article supplement (doi:10.1039/c6ra01135g), 2016-01-01
Supplement: c6ra01135g1.pdf [file c6ra01135g1.pdf]

## Targeted Theranostic liposomes: Rifampicin and Ofloxacin loaded pegylated liposomes for theranostic application in mycobacterial infections

Ankur Kaul<sup>a</sup>, Shubhra Chaturvedi, Asha Attri<sup>b</sup>, Mohini Kalra<sup>b</sup>, AK Mishra<sup>a\*</sup>.

### SUPPLEMENTARY INFORMATION

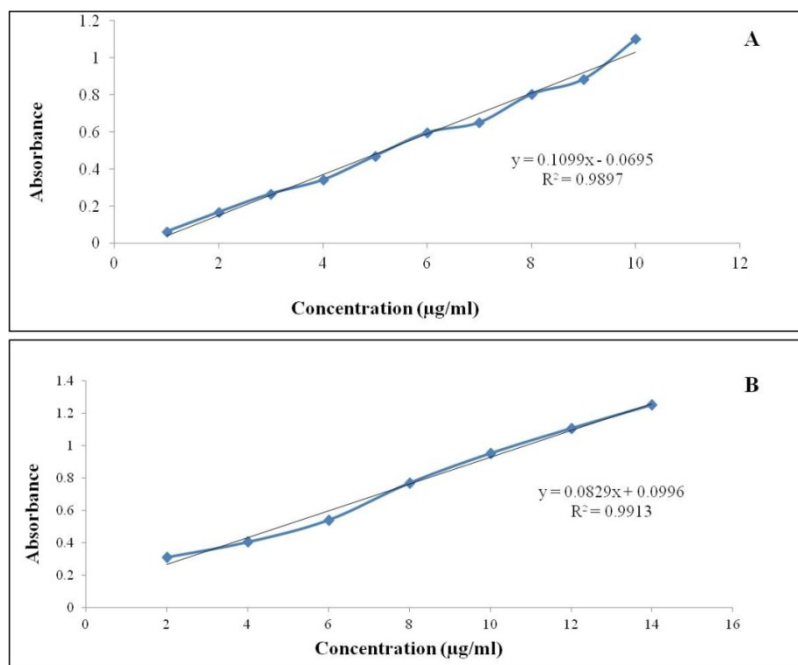

Fig S1 Standard calibration curves for (A) Rifampicin and (B) Ofloxacin respectively determined using UV/Vis spectrophotometer.

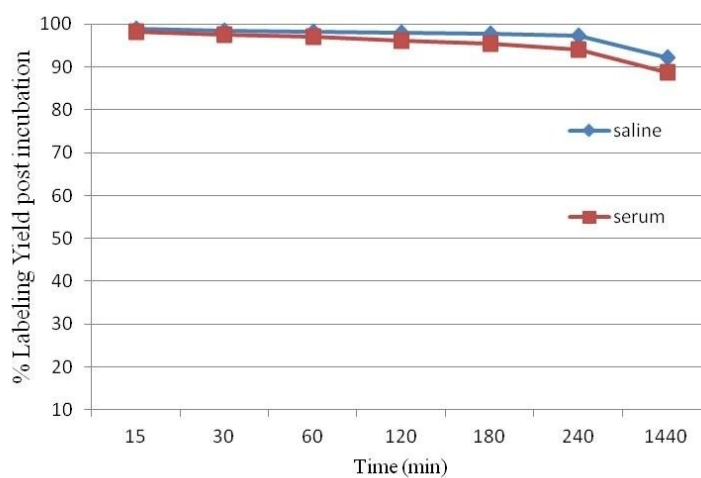

Fig S2 In-vitro serum stability studied upto 24 h post-labeling with <sup>99m</sup>Tc.
